# Supplementary material
Source: HighWire-hosted journal article supplement (http://dmd.aspetjournals.org/highwire/filestream/66253/field_highwire_adjunct_files/2/DMD_51391supplemental-table-1.pdf)
Supplement: DMD_51391supplemental-table-1.pdf [file DMD_51391supplemental-table-1.pdf]

## Combinatorial Metabolism Notably Affects Human Systemic Exposure to Ginsenosides from Orally Administered Extract of *Panax notoginseng* Roots (Sanqi)

Zheyi Hu, Junling Yang, Chen Cheng, Yuhong Huang, Feifei Du, Fengqing Wang, Wei Niu, Fang Xu, Rongrong Jiang, Xiumei Gao, Chuan Li

### *Drug Metabolism and Disposition*

### Supplemental Table 1

In vitro metabolism of compound-K, 20(S)-protopanaxadiol, and 20(S)-protopanaxatriol using human liver microsomes, rat liver microsomes or rat colon microsomes

| Compound                   | <i>In vitro</i> metabolism $t_{1/2}$<br>(min) [cofactor] | Precursor/human metabolite information                                   |                           |             |                                   |                                             |
|----------------------------|----------------------------------------------------------|--------------------------------------------------------------------------|---------------------------|-------------|-----------------------------------|---------------------------------------------|
|                            |                                                          | Precursor or metabolite (change in mass,<br>possible metabolic reaction) | Relative abundance<br>(%) | $t_R$ (min) | Parent ion**<br>( $m/z$ )         | Product ion<br>( $m/z$ )                    |
| Compound-K                 | Human liver microsomes                                   | Compound-K (0)                                                           | 100                       | 15.95       | 623                               | 407, 425, 443                               |
|                            | >120 [1]/[2]/[3]*                                        | <b>M1</b> (+16, epoxidation)                                             | 5                         | 14.40       | 639                               | 125, 143, 191, 405, 423, 441                |
|                            | Rat liver microsomes                                     | <b>M2</b> (+16, epoxidation)                                             | 10                        | 14.51       | 639                               | 125, 143, 191, 405, 423, 441                |
|                            | >120 [1]/[2]/[3]                                         | <b>M30</b> (+16, oxidation)                                              | 7                         | 14.74       | 639                               | 125, 143, 191, 405, 423, 441                |
|                            | Rat colon microsomes<br>>120 [1]/[2]/[3]                 |                                                                          |                           |             |                                   |                                             |
| 20(S)-Proto-<br>panaxadiol | Human liver microsomes                                   | Protopanaxadiol (0)                                                      | 100                       | 17.74       | 467                               | 407, 425                                    |
|                            | 6 [1]/>120 [2]/4 [3]                                     | <b>M16</b> (+34, alkenes to dihydrodiol)                                 | 2                         | 13.95       | 495                               | 125, 143, 191, 405, 423, 441, 459, 477      |
|                            | Rat liver microsomes                                     | <b>M17</b> (+32, oxidation)                                              | 24                        | 14.30       | 493                               | 125, 143, 191, 403, 421, 439, 457, 475      |
|                            | 20 [1]/>120 [2]/20 [3]                                   | <b>M18</b> (+34, alkenes to dihydrodiol)                                 | 1                         | 14.70       | 495                               | 125, 143, 191, 405, 423, 441, 459, 477      |
|                            | Rat colon microsomes                                     | <b>M19</b> (+32, oxidation)                                              | 22                        | 15.35       | 493                               | 123, 141, 159, 191, 403, 421, 439, 457, 475 |
|                            | >120 [1]/[2]/[3]                                         | <b>M20</b> (+16, epoxidation)                                            | 69                        | 15.51       | 477                               | 125, 143, 191, 405, 423, 441, 459           |
|                            |                                                          | <b>M21</b> (+16, epoxidation)                                            | 184                       | 15.78       | 477                               | 125, 143, 191, 405, 423, 441, 459           |
|                            |                                                          | <b>M22</b> (+16, epoxidation)                                            | 24                        | 16.22       | 477                               | 125, 143, 191, 405, 423, 441, 459           |
|                            | <b>M34</b> (+46, oxidation/dehydrogenation)              | 8                                                                        | 12.70                     | 507         | 125, 143, 417, 435, 453, 471, 489 |                                             |

|                         |                        |                                              |      |       |     |                                                  |
|-------------------------|------------------------|----------------------------------------------|------|-------|-----|--------------------------------------------------|
|                         |                        | <b>M35</b> (+48, oxidation)                  | 2    | 13.34 | 509 | 159, 401, 419, 437, 455, 473, 491                |
|                         |                        | <b>M36</b> (+192, oxidation/glucuronidation) | 0.2  | 14.63 | 653 | 125, 143, 191, 405, 423, 441, 599, 617, 635      |
|                         |                        | <b>M37</b> (+192, oxidation/glucuronidation) | 0.2  | 14.74 | 653 | 125, 143, 191, 405, 423, 441, 599, 617, 635      |
|                         |                        | <b>M38</b> (+192, oxidation/glucuronidation) | 0.05 | 15.15 | 653 | 125, 143, 191, 405, 423, 441, 599, 617, 635      |
| 20(S)-Proto-panaxatriol | Human liver microsomes | Protopanaxatriol (0)                         | 100  | 14.14 | 477 | 405, 423, 441, 459                               |
|                         | 4 [1]/>120 [2]/5 [3]   | <b>M3</b> (+34, alkenes to dihydrodiol)      | 5    | 9.36  | 511 | 125, 143, 189, 207, 403, 421, 439, 457, 475, 493 |
|                         | Rat liver microsomes   | <b>M4</b> (+32, oxidation)                   | 130  | 9.45  | 509 | 141, 159, 189, 207, 401, 419, 437, 455, 473, 491 |
|                         | 4 [1]/>120 [2]/7 [3]   | <b>M5</b> (+32, oxidation)                   | 157  | 10.00 | 509 | 141, 159, 189, 207, 401, 419, 437, 455, 473, 491 |
|                         | Rat colon microsomes   | <b>M6</b> (+34, alkenes to dihydrodiol)      | 8    | 10.26 | 511 | 125, 143, 189, 207, 403, 421, 439, 457, 475, 493 |
|                         | >120 [1]/[2]/[3]       | <b>M7</b> (+30, oxidation/dehydrogenation)   | 40   | 10.45 | 507 | 141, 159, 417, 435, 453, 471, 489                |
|                         |                        | <b>M8</b> (+32, oxidation)                   | 848  | 10.97 | 509 | 141, 159, 189, 207, 401, 419, 437, 455, 473, 491 |
|                         |                        | <b>M9</b> (+30, oxidation/dehydrogenation)   | 10   | 11.35 | 507 | 141, 159, 417, 435, 453, 471, 489                |
|                         |                        | <b>M10</b> (+16, epoxidation)                | 158  | 11.76 | 493 | 125, 143, 189, 207, 403, 421, 439, 457, 475      |
|                         |                        | <b>M11</b> (+32, oxidation)                  | 233  | 12.11 | 509 | 125, 143, 187, 205, 401, 419, 437, 455, 473, 491 |
|                         |                        | <b>M12</b> (+16, epoxidation)                | 2381 | 12.21 | 493 | 125, 143, 189, 207, 403, 421, 439, 457, 475      |
|                         |                        | <b>M13</b> (+30, oxidation/dehydrogenation)  | 30   | 12.25 | 507 | 125, 143, 417, 435, 453, 471, 489                |
|                         |                        | <b>M14</b> (+14, oxidation/dehydrogenation)  | 167  | 12.43 | 491 | 125, 143, 419, 437, 455, 473                     |
|                         |                        | <b>M15</b> (+14, oxidation/dehydrogenation)  | 211  | 13.07 | 491 | 125, 143, 419, 437, 455, 473                     |
|                         |                        | <b>M23</b> (+208, oxidation/glucuronidation) | 0.2  | 8.22  | 685 | 141, 159, 189, 207, 419, 437, 455, 473, 509, 667 |
|                         |                        | <b>M24</b> (+208, oxidation/glucuronidation) | 0.2  | 9.10  | 685 | 141, 159, 189, 207, 419, 437, 455, 473, 509, 667 |
|                         |                        | <b>M25</b> (+192, oxidation/glucuronidation) | 1    | 9.16  | 669 | 125, 143, 189, 207, 403, 421, 439, 457, 651      |
|                         |                        | <b>M26</b> (+208, oxidation/glucuronidation) | 1    | 10.36 | 685 | 125, 143, 187, 205, 419, 437, 455, 473, 509, 667 |
|                         |                        | <b>M27</b> (+192, oxidation/glucuronidation) | 4    | 10.36 | 669 | 125, 143, 189, 207, 403, 421, 439, 457, 651      |
|                         |                        | <b>M28</b> (+192, oxidation/glucuronidation) | 0.3  | 11.40 | 669 | 125, 143, 189, 207, 403, 421, 439, 457, 651      |
|                         |                        | <b>M29</b> (+176, glucuronidation)           | 5    | 11.90 | 653 | 477                                              |
|                         |                        | <b>M31</b> (+208, oxidation/glucuronidation) | 0.1  | 8.59  | 685 | 141, 159, 189, 207, 419, 437, 455, 473, 509, 667 |

|                                              |     |       |     |                                                  |
|----------------------------------------------|-----|-------|-----|--------------------------------------------------|
| <b>M32</b> (+208, oxidation/glucuronidation) | 0.1 | 9.72  | 685 | 125, 143, 187, 205, 419, 437, 455, 473, 509, 667 |
| <b>M33</b> (+32, oxidation)                  | 174 | 11.73 | 509 | 125, 143, 187, 205, 401, 419, 437, 455, 473, 491 |

---

Human liver microsomes, rat liver microsomes, and rat colon microsomes showed in vitro metabolism  $t_{1/2}$  values of 5, 4, and >120 min, respectively, for midazolam hydroxylation (the cofactor, NADPH) or 9, 14, and 16 min, respectively, for chrysin glucuronidation (the cofactor, UDPGA).

\*[1], NADPH; [2], UDPGA; [3], NADPH + UDPGA.

\*\*All the compounds were measured as protonated molecules, except for 20(*S*)-protopanaxadiol measured as lithiated adduct ion.
